# Supplementary material for: LiF doped β-PbSnF 4 with improved ionic conductivity toward high-performance all-solid-state fluoride-ion batteries
Source: Royal Society of Chemistry journal article supplement (doi:10.1039/d5ta01188d), 2025-01-01
Supplement: d5ta01188d1.pdf [file d5ta01188d1.pdf]

## Experimental Section

*Electrolyte Synthesis:*  $\text{PbSnF}_4$  was synthesized by the following steps: The following reagents were the starting compounds for synthesis: high-purity  $\text{Pb}(\text{NO}_3)_2$  (99.99%, Aladdin); analytically pure  $\text{NH}_4\text{F}$  (99.99%, Aladdin),  $\text{SnF}_2$  (99.99%, Aladdin),  $\text{LiF}$  (99.99%, Aladdin). Firstly, a solution of  $\text{Pb}(\text{NO}_3)_2$  in distilled water was gradually added a threefold excess of a  $\text{NH}_4\text{F}$  solution, the product is obtained through precipitation. Afterward, washing the resulting precipitate several times with distilled water, then dried at 353 K for about 5 h and calcined the  $\gamma\text{-PbF}_2$  at 753-773 K with a heating rate of  $5^\circ\text{C min}^{-1}$ . “As a result,  $\beta\text{-PbF}_2$  was obtained as a precursor. Subsequently,  $\text{PbF}_2$  and  $\text{LiF}$  were thoroughly ground, mixed in a 1:3 molar ratio, and pressed into pellets. The resulting pressed mixtures were heated to 873 K with a heating rate of  $5^\circ\text{C min}^{-1}$  to obtain the final sintered  $\text{PbSnF}_4$  in quartz tubes in a high-purity argon atmosphere and held at this temperature for 5 h with subsequent cooling to room temperature with switched-off furnace. In the third stage, the obtained solid solutions were fused with equimolar amounts of  $\text{SnF}_2$  in crucibles in an argon atmosphere, held at 773 K with a heating rate of  $5^\circ\text{C min}^{-1}$  for 20 min and cooled to room temperature with switched-off furnace. After all the steps, the obtained were nonstoichiometric  $\text{PbSnF}_4@\text{LiF}$  phases. At last, stoichiometric amounts of the materials were mixed in the agate mortar, and then milled using WC balls (5 mm diameter) and WC jars (45 ml) on a planetary mill; the milling was conducted at 500 rpm for 8 h in Ar atmosphere, and the ball-to-powder ratio was 20:1. It was important that all steps should be completed under argon protection.

*Composite Electrode Material Preparation:* because of the reason that  $\text{CuF}_2$  has a poor  $\text{F}^-$  ionic conductivity and electron conductivity, engineering of an additional ionic and electronic were required in order to prepared the composite cathode of  $\text{CuF}_2$ - $\text{PbSnF}_4@ \text{LiF}$ -C (abbreviated as CPC). From this point of views, the conductive carbon and the solid electrolyte  $\text{PbSnF}_4@ \text{LiF}$  were mixed into cathode in order to increase the ionic and electronic conductors in CPC cathode. A typical high-energy ball milling procedure (with a rotating speed of 600 rpm for 5 h) was implemented for the mixture of commercial anhydrous  $\text{CuF}_2$  (99.99%, Aladdin), as-prepared  $\text{PbSnF}_4@ \text{LiF}$  and Super P with a mass ratio of 3:6:1.

In view of the poor  $\text{F}^-$  ionic conductivity and less reactive interfaces of pure metal anodes, the additional ionic wiring engineering was required to prepare the composite anode of  $\text{Pb}+\text{PbF}_2$ -  $\text{PbSnF}_4@ \text{LiF}$  -C (abbreviated as PPC). This composite anode was prepared by mixing Sn (99.9%, Aladdin),  $\text{SnF}_2$ ,  $\text{KSn}_2\text{F}_5$ , and Super P with a mass ratio of 2.5:2.5:4:1 using the typical high-energy ball milling procedure (with a rotating speed of 600 rpm for 5 h).

*Ionic and Electronic Conduction Estimation of  $\text{PbSnF}_4@ \text{LiF}$ :* putting 120mg  $\text{PbSnF}_4@ \text{LiF}$  inside the metal mold, then pressed it into a pellet with a diameter of 10mm under the pressure of 200 MPa for 2 minutes. Then the construction of ionic blocking layer was executed via blading conductive gold paste on both sides of the pellet, followed by drying at 80 °C for 2 h. Note that, the drying step should be completed under argon protection. Subsequently,  $\text{Au} | \text{PbSnF}_4@ \text{LiF} | \text{Au}$  was assembled into a button cell in order to measure impedance performance though an

electrochemical workstation with a frequency range from 10 MHz to 100 Hz and an excitation voltage of 100 mV. Ionic conductivity can be estimated by equation (3):

$$\sigma = \frac{L}{RS} \quad (3)$$

where L, S, and R denote the thickness, area, and resistance of the pellet, respectively.

*Preparation of Electrodes:* The cathode was prepared by mixing CPC powder, binder poly (vinyl difluoride) (PVDF, Sigma-Aldrich, dissolved in 1-methyl-2-pyrrolidinone, Sinopharm Chemical Reagent Co., Ltd,  $\geq 99.0\%$ , with a mass concentration of 1 mg per 20  $\mu\text{L}$ ) and conductive carbon (Super P, MTI Corporation) with a weight ratio of 7:1:2. The slurry anode was prepared by mixing PPC powder, PVDF, and conductive carbon with a weight ratio of 7:1:2. Then both the cathode and anode slurries were pasted on the pure Al and Cu foils, and then dried at the temperature of 60 °C for 12 h in vacuum.

*Fabrication and Operation of ASSFIBs:* for the better integration of solid -solid interfaces, the THF solution with 1 m TBAF(Aladdin) was used as the interface wetting reagent because the reason that its relative stability and ideal  $\text{F}^-$  conductivity. In the progress during battery assembling, the both sides of the pressured pellet would be dropped about 3  $\mu\text{L}$  TBAF/THF solution to get wet. Then the anode and cathode membranes (both  $\Phi 10$ ) were appressed to each side of the electrolyte pellet surface. LSV test was based on the full cells using above technique. The measurement of electrochemical window of the  $\text{PbSnF}_4@\text{LiF}$  electrolyte would be test in architecture of  $\text{Pb}+\text{PbF}_2|\text{PbSnF}_4@\text{LiF}|\text{PbSnF}_4@\text{LiF}-\text{C}$  cell was also conducted on this

electrochemical workstation at a scan rate of  $1.0 \text{ mV s}^{-1}$ . The as-assembled  $\text{Pb}+\text{PbF}_2 | \text{PbSnF}_4@\text{LiF} | \text{CuF}_2$  cell was placed into an oven at  $80^\circ\text{C}$  for 5 h with the follow-up galvanostatic discharge–charge cycling performance measurement on the Land multichannel battery testing system (CT2001A) at the same temperature. The galvanostatic discharge–charge tests were carried out at a current density of  $60 \text{ mA g}^{-1}$  with a discharge cut-off voltage of  $-0.4 \text{ V}$  (versus  $\text{Pb}/\text{PbF}_2$ ) and a charge cut-off specific capacity of  $300 \text{ mAh g}^{-1}$ .

*Characterization of Materials:* The crystal structure and phase purity of the synthesized materials were studied by powder X-ray diffraction (XRD) using  $\text{Cu K}\alpha 1$  radiation in a  $2\theta$  range from  $10^\circ$  to  $80^\circ$  at a scanning rate of  $10^\circ \text{ min}^{-1}$  to detect the evolution of chemical composition, elemental valence, and bonding situation of the material at different post-reaction states. The samples were sealed using parafilm during measurement to prevent air exposure. The SEM observation was conducted using a SEM (Nova NanoSEM450) scanning electron microscope operated at 3 kV. And the nanostructure of the solid electrolyte interphase (SEI) was examined using transmission electron microscopy (TEM). Note that, for all the ex-situ characterizations, the post-reaction samples were drawn out from the disassembled batteries and then sealed in a bottle in the Ar-filled glove box before the transfer to the corresponding testing chamber.

**Supporting figures:**

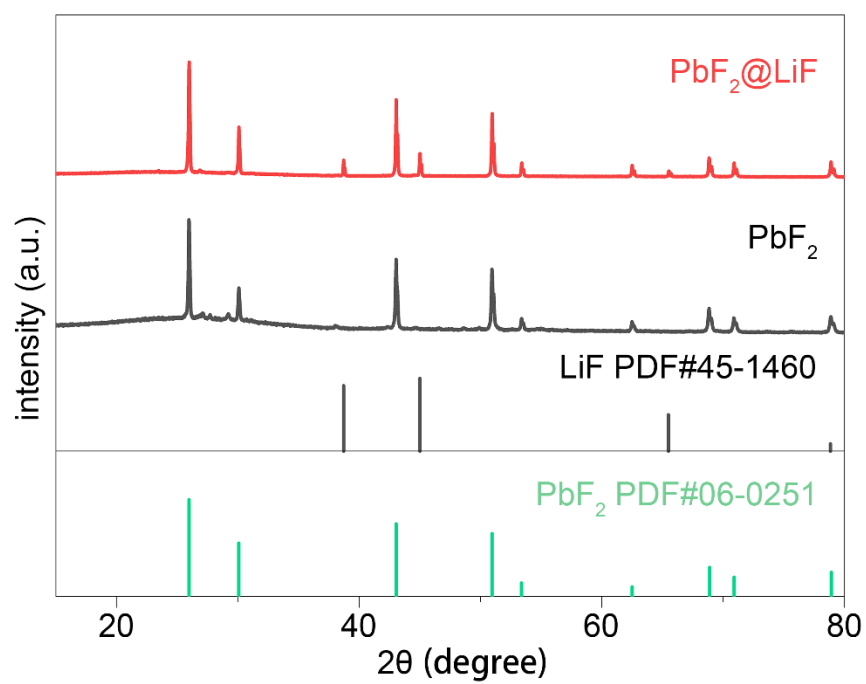

**Figure S1.** XRD patterns of PbF<sub>2</sub> and PbF<sub>2</sub>@LiF.

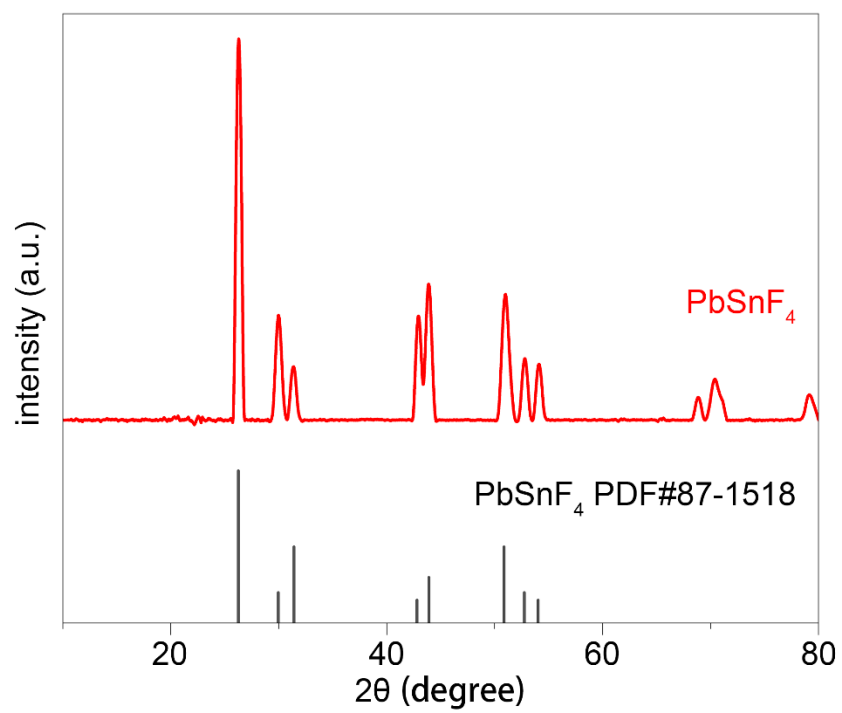

**Figure S2.** XRD pattern of synthetic  $\text{PbSnF}_4$ .

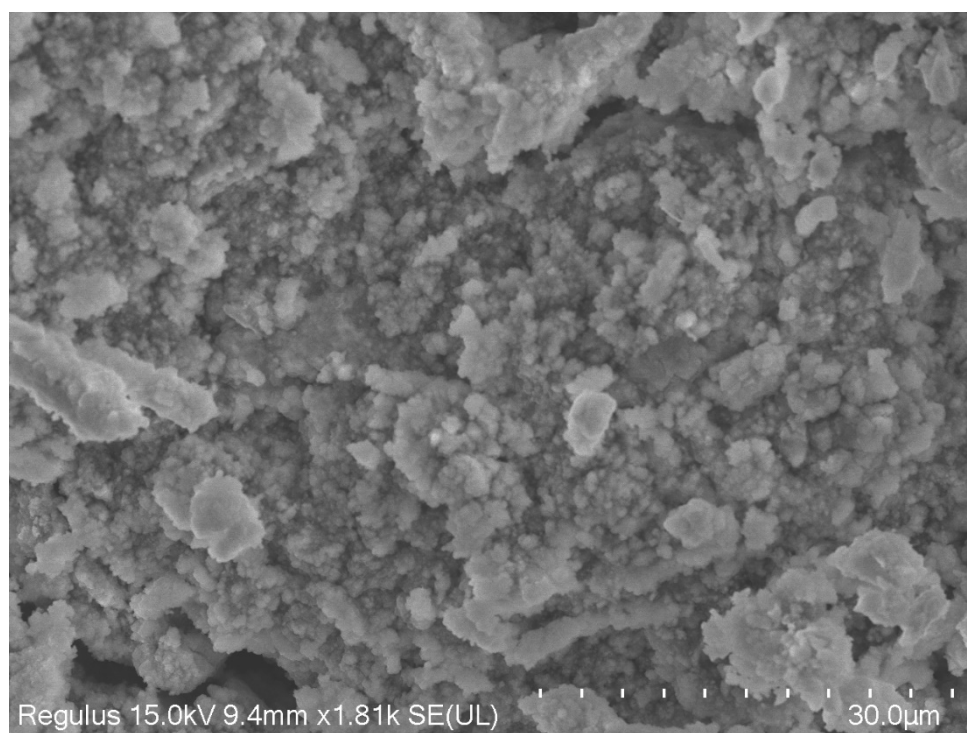

**Figure S3.** SEM image of the morphology of PbSnF<sub>4</sub> powders.

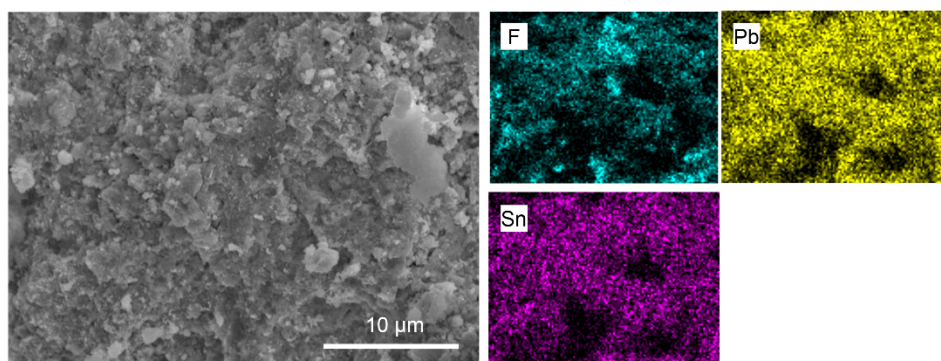

**Figure S4.** SEM image and the corresponding EDS mapping results of the  $\text{PbSnF}_4$  powders.



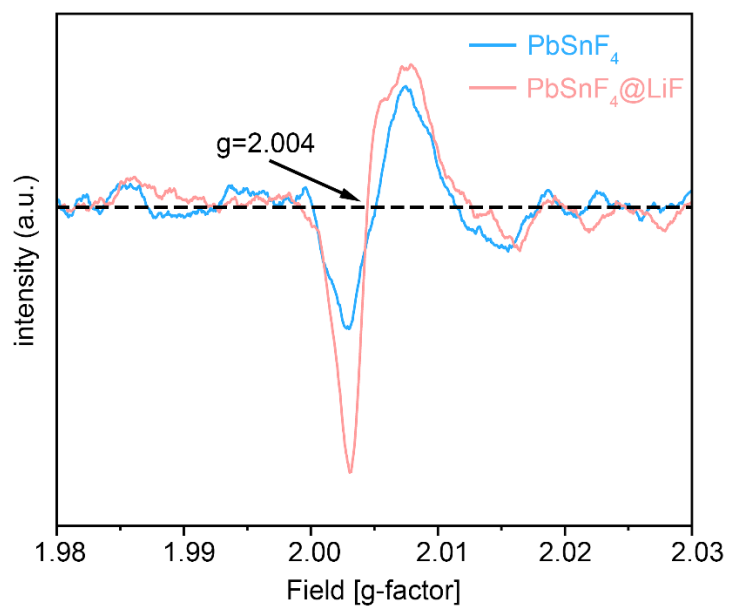

**Figure S5.** EPR testing of fluorine vacancies in  $\text{PbSnF}_4$  and  $\text{PbSnF}_4@\text{LiF}$ .

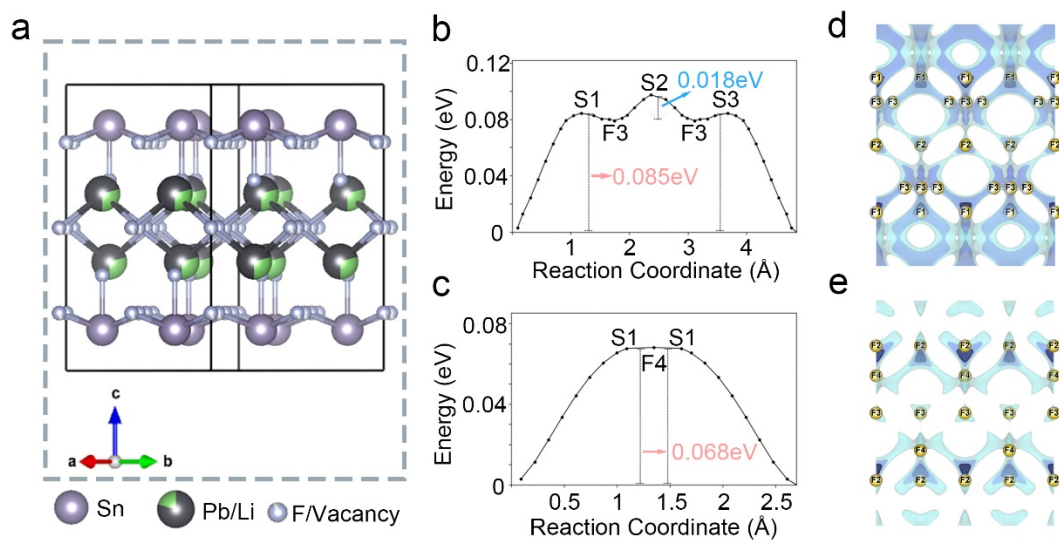

**Figure S6.** (a) The crystal structure of  $\text{PbSnF}_4@\text{LiF}$  unit cell was visualized using VESTA. (b) The migration barrier energy of F-ions through different sites in  $\text{PbSnF}_4@\text{LiF}$  and  $\text{PbSnF}_4$ . (d and e) Schematic diagram of fluoride ion transport pathways in  $\text{PbSnF}_4@\text{LiF}$  and  $\text{PbSnF}_4$ .

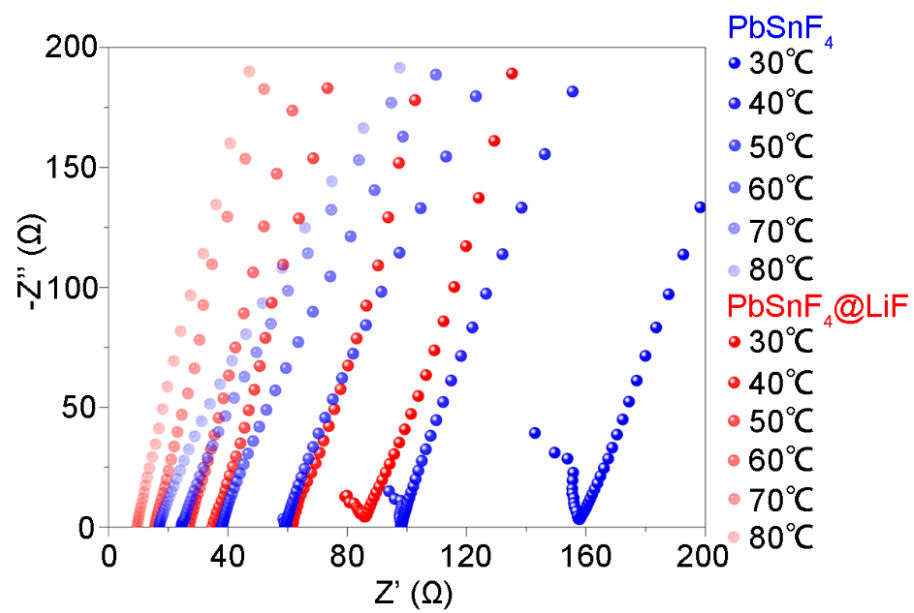

**Figure S7.** Nyquist plots of  $\text{PbSnF}_4$  and  $\text{PbSnF}_4@\text{LiF}$  at different temperatures (30-80 °C).

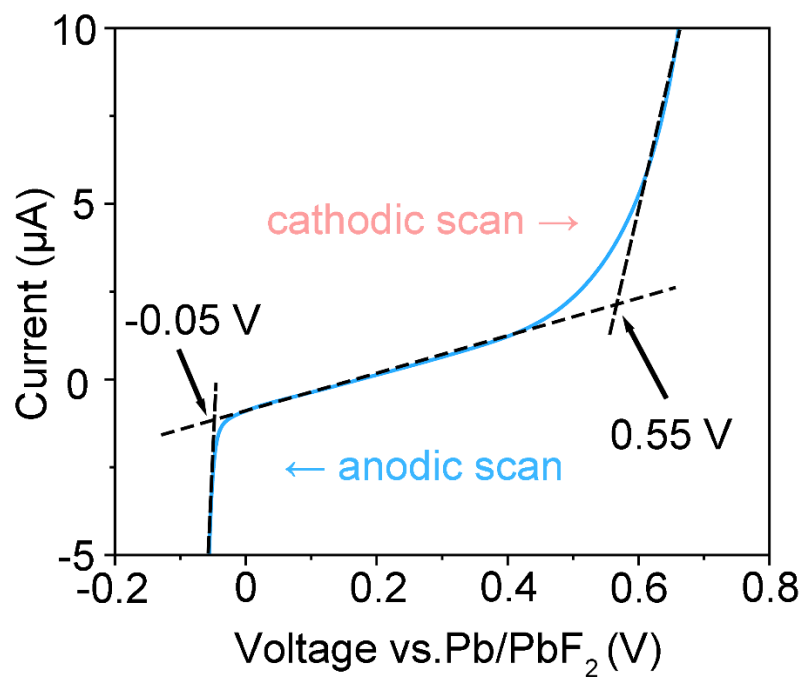

**Figure S8.** LSV curves of the  $\text{CuF}_2|\text{PbSnF}_4|\text{Pb}+\text{PbF}_2$  full cell at  $0.02 \text{ mV s}^{-1}$ .

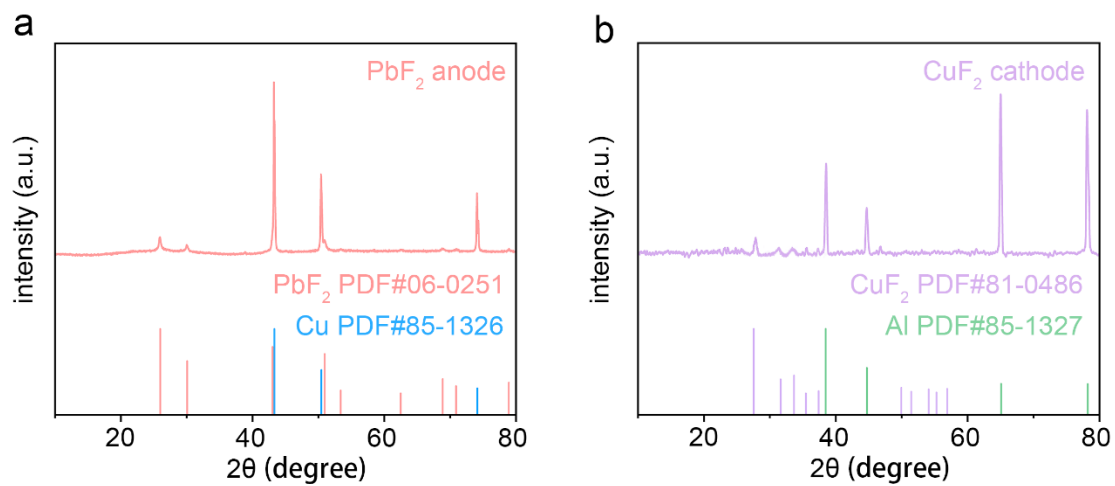

**Figure S9.** XRD patterns of the synthesized (a)  $\text{PbF}_2$  anode and (b)  $\text{CuF}_2$  cathode materials.

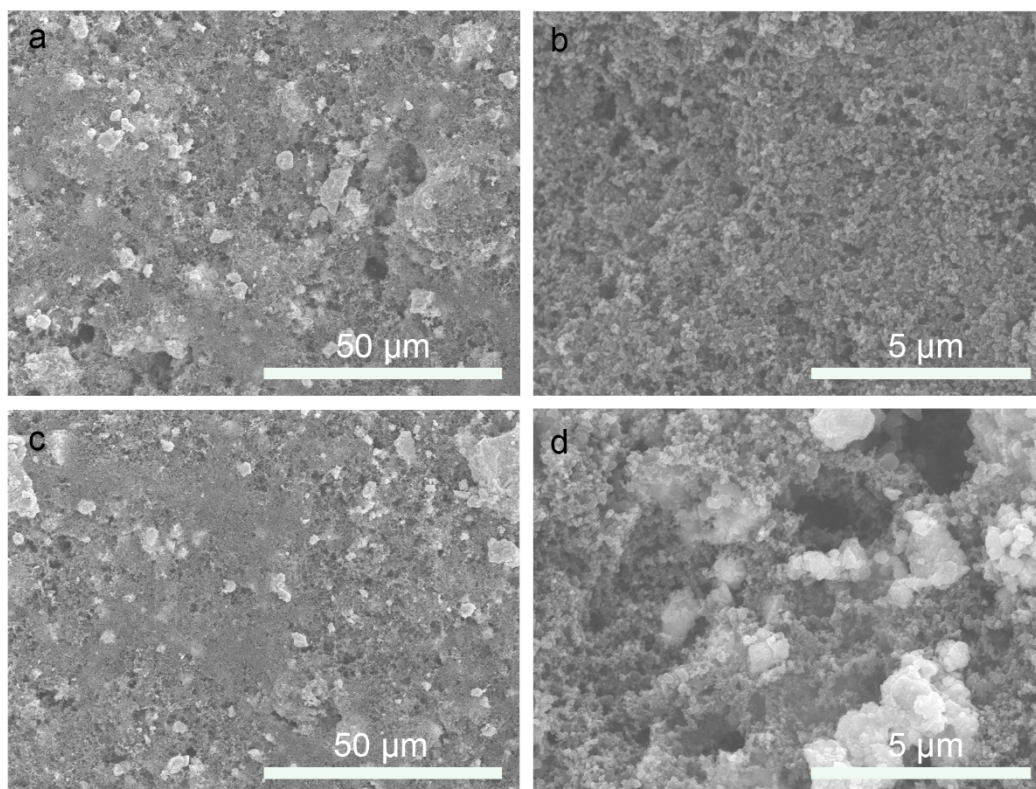

**Figure S10.** SEM images of the synthesized  $\text{PbF}_2$  anode (a and b) before cycling and (c and d) after 10 cycles.

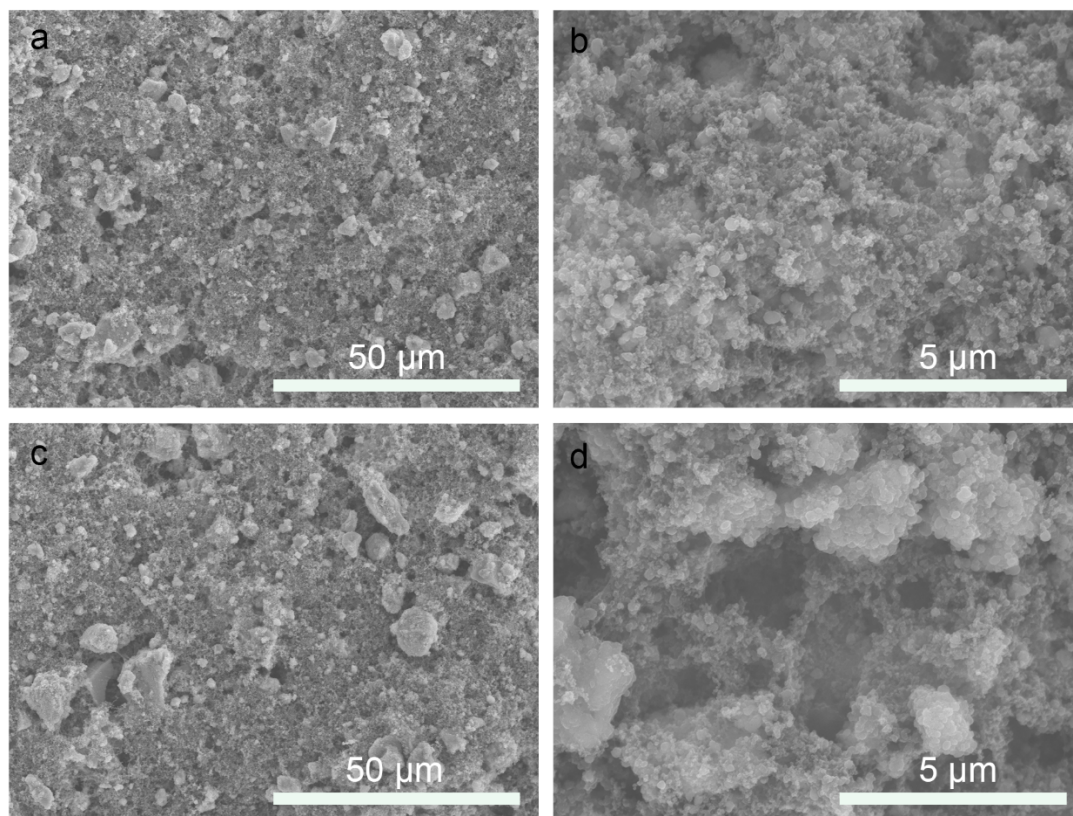

**Figure S11.** SEM patterns of the synthesized CuF<sub>2</sub> cathode (a and b) before cycling and (c and d) after 10 cycles.

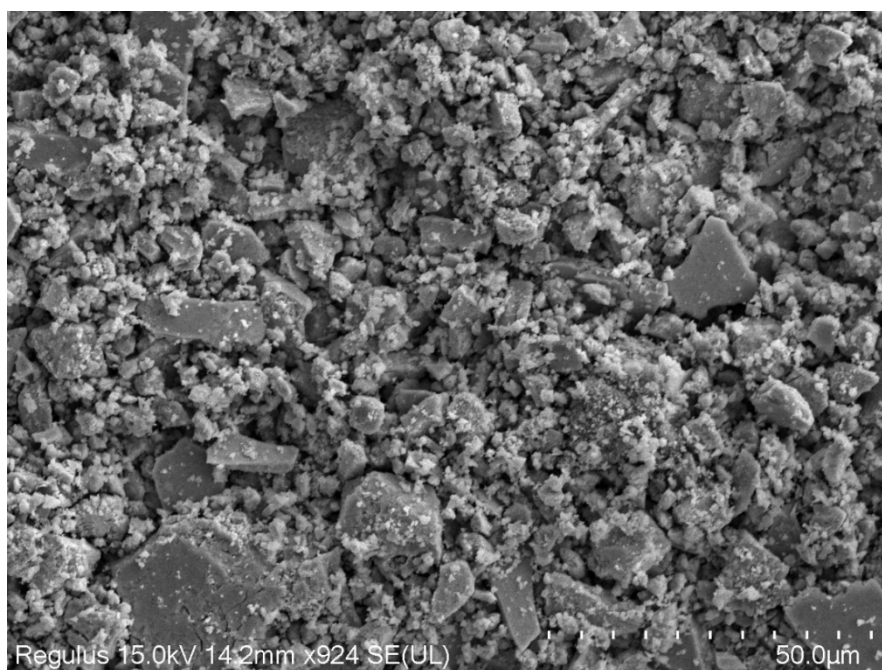

**Figure S12.** SEM image of the morphology of CuF<sub>2</sub> cathode.



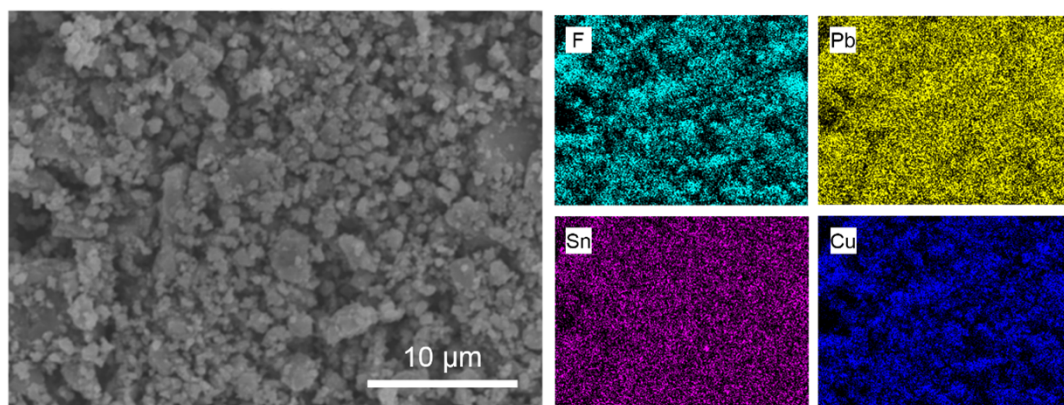

**Figure S13.** SEM image and the corresponding EDS mapping results of the  $\text{CuF}_2$  cathode.

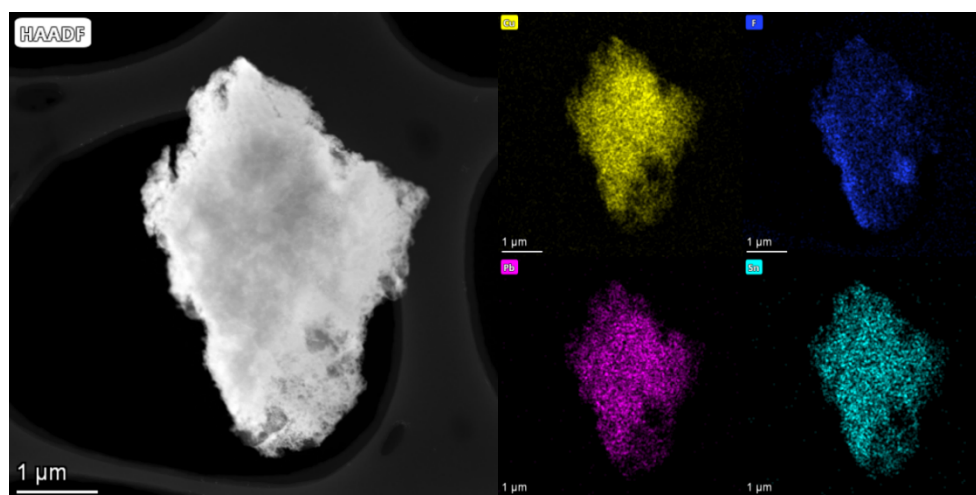

**Figure S14.** STEM image and the corresponding EDS mapping results of the  $\text{CuF}_2$  cathode.

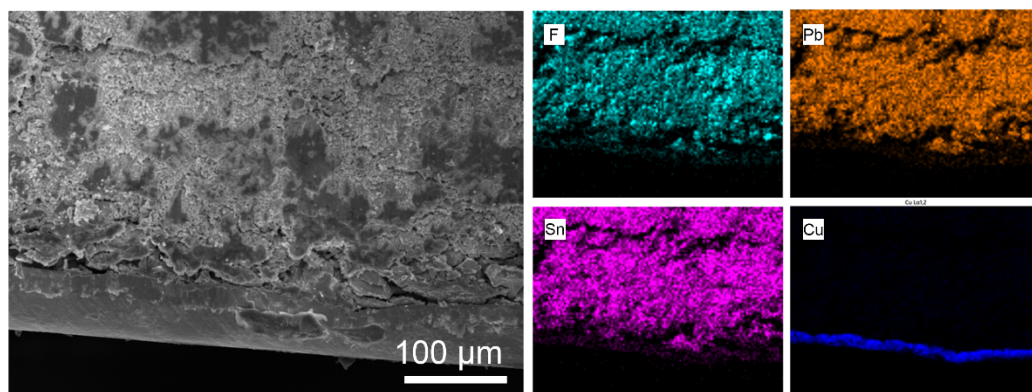

**Figure S15.** SEM image and the corresponding EDS mapping results of the  $\text{CuF}_2$  cathode after cycling.

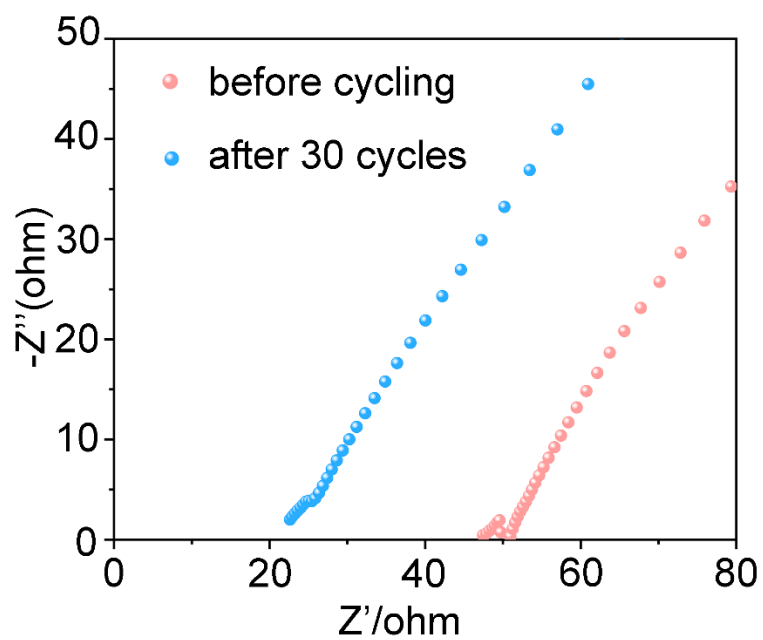

**Figure S16.** EIS patterns of  $\text{CuF}_2|\text{PbSnF}_4@\text{LiF}|\text{Pb}+\text{PbF}_2$  full cells before cycling and after 30 cycles.

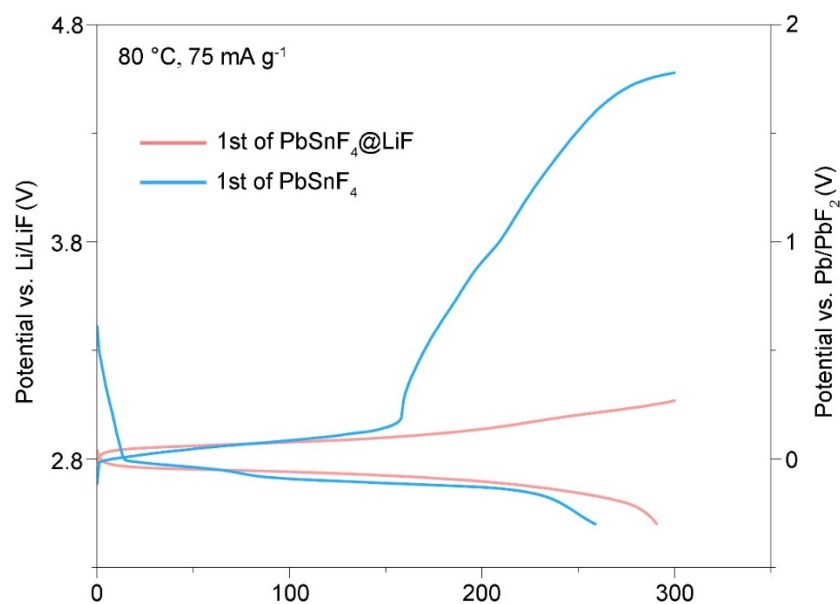

**Figure S17.** The initial discharge/charge curves of the assembled  $\text{CuF}_2|\text{PbSnF}_4|\text{Pb}+\text{PbF}_2$  and  $\text{CuF}_2|\text{PbSnF}_4@\text{LiF}|\text{Pb}+\text{PbF}_2$  full cells at the current density of  $75 \text{ mA g}^{-1}$  with a capacity of  $300 \text{ mAh g}^{-1}$ .

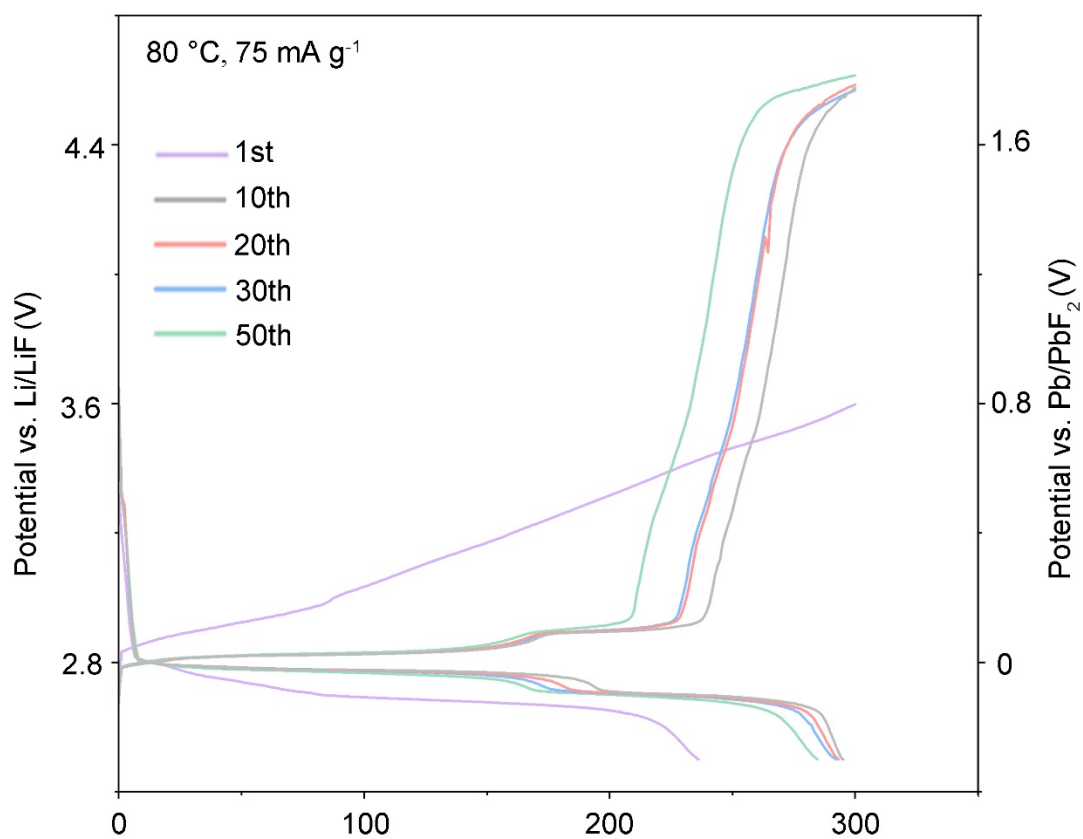

**Figure S18.** The discharge/charge curves of the CuF<sub>2</sub>|PbSnF<sub>4</sub>|Pb+PbF<sub>2</sub> full cell after 1-50 cycles at the current density of 75 mA g<sup>-1</sup>.

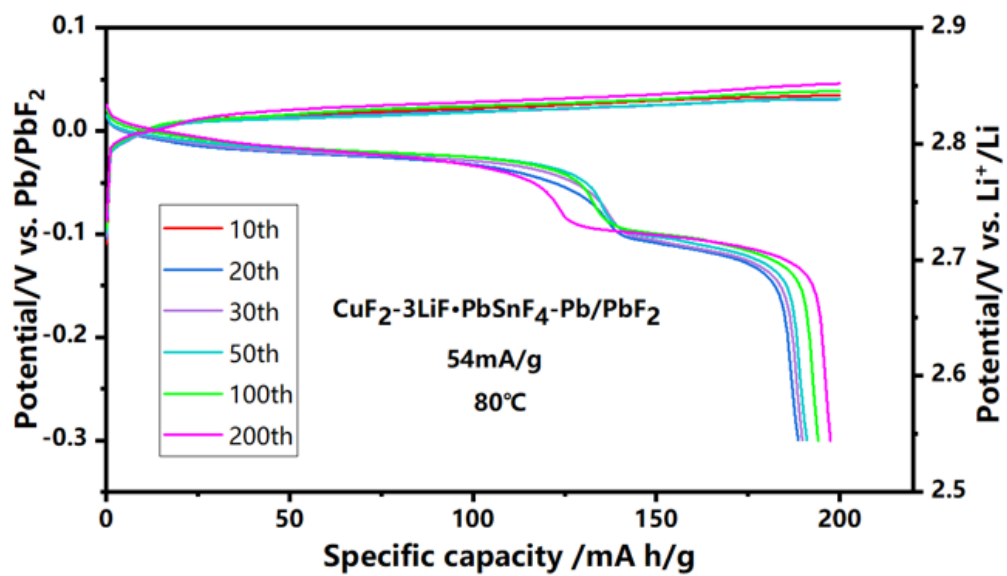

**Figure S19.** The voltage-capacity curves of the assembled  $\text{CuF}_2|3\text{LiF-PbSnF}_4\text{-Pb/PbF}_2$  full cells at room temperature with a capacity of  $200\text{ mAh g}^{-1}$ .

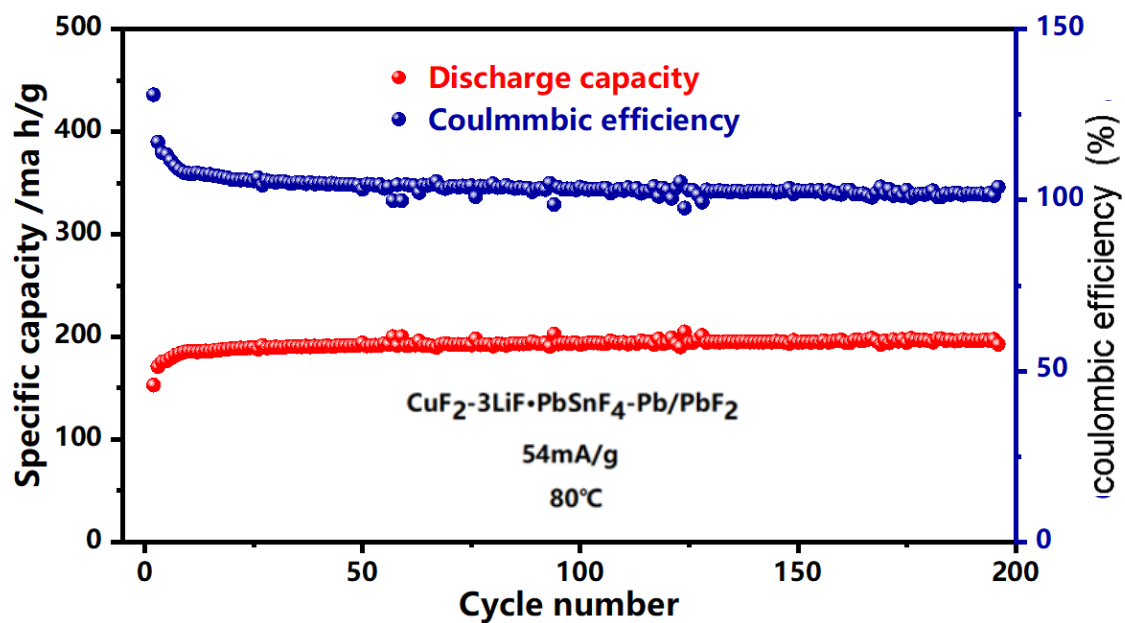

**Figure S20.** The cycling performance of the  $\text{CuF}_2 \cdot 3\text{LiF} \cdot \text{PbSnF}_4\text{-Pb/PbF}_2$  full cell with a capacity of  $200 \text{ mAh g}^{-1}$ .



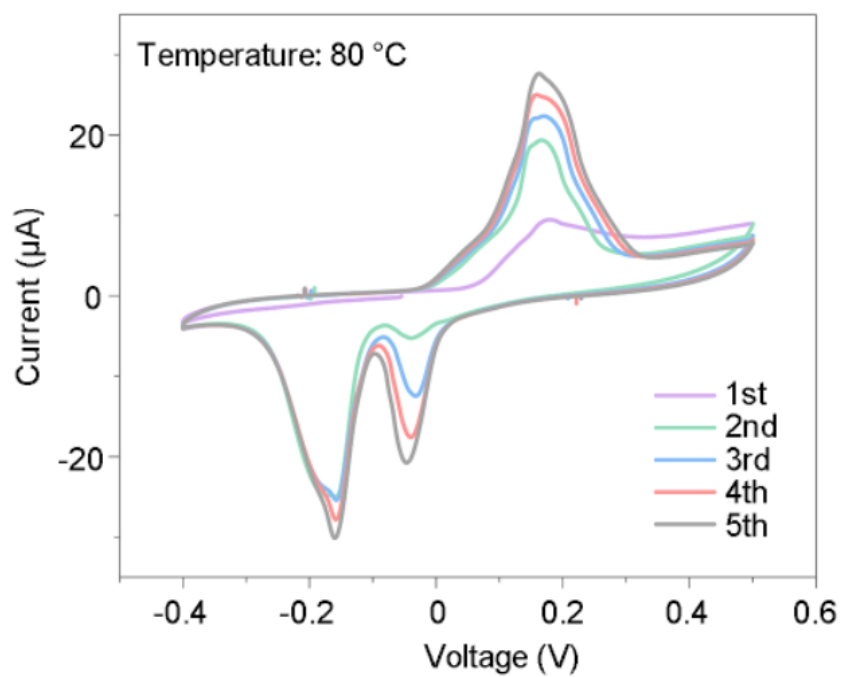

**Figure S21.** CV curves of the  $\text{CuF}_2|\text{PbSnF}_4@\text{LiF}|\text{Pb}+\text{PbF}_2$  full cell at  $0.02 \text{ mV s}^{-1}$ .

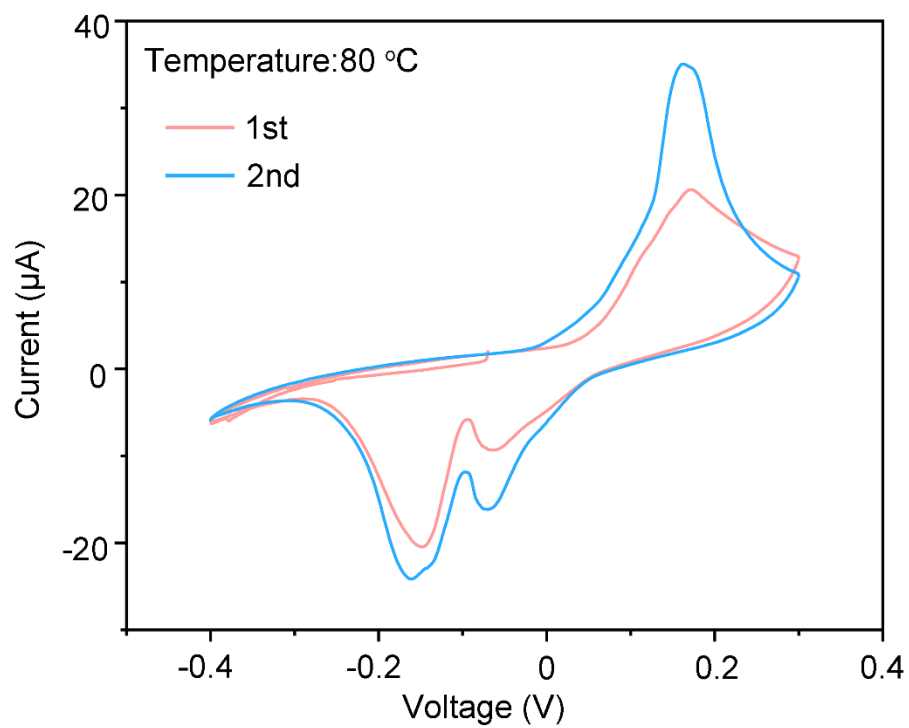

**Figure S22.** CV curves of the  $\text{CuF}_2|\text{PbSnF}_4|\text{Pb}+\text{PbF}_2$  full cell at  $0.02 \text{ mV s}^{-1}$

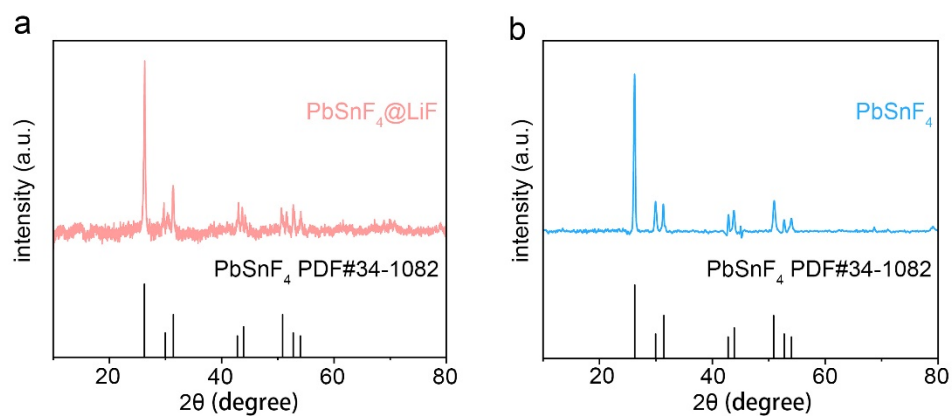

**Figure S23.** XRD patterns of the obtained (a)  $\text{PbSnF}_4@LiF$  and (b)  $\text{PbSnF}_4$  after cycles.

**Table S1.** Summary of the performance of all solid-state fluoride ion batteries assembled with various solid electrolytes.

| Cathode/SE/Anode                                                                                                                         | Cycle number | Current density (mA g <sup>-1</sup> ) | Temperature (°C) | Capacity at 1 <sup>st</sup> discharge (mAh g <sup>-1</sup> ) | Capacity Retention (mAh g <sup>-1</sup> ) |
|------------------------------------------------------------------------------------------------------------------------------------------|--------------|---------------------------------------|------------------|--------------------------------------------------------------|-------------------------------------------|
| BiF <sub>3</sub> / PbSnF <sub>4</sub> /Sn                                                                                                | 120          | 40                                    | 25               | 115.6                                                        | 102.1                                     |
| BiF <sub>3</sub> / PbSnF <sub>4</sub> /Sn                                                                                                | 100          | 8                                     | -20              | 90.1                                                         | 84.6                                      |
| Sr <sub>3</sub> Fe <sub>2</sub> O <sub>5</sub> F <sub>2</sub> /La <sub>0.9</sub> Ba <sub>0.1</sub> F <sub>2.9</sub> /Pb-PbF <sub>2</sub> | 70           | 5                                     | 140              | 94.4                                                         | 118                                       |
| CuF <sub>2</sub> / La <sub>0.95</sub> Sr <sub>0.05</sub> F <sub>2.95</sub> /Pb-PbF <sub>2</sub>                                          | 10           | 9.5                                   | 25               | 410                                                          | 459                                       |
| GLG300/ La <sub>0.97</sub> Ba <sub>0.03</sub> F <sub>2.97</sub>                                                                          | 9            | 0.63                                  | 75               | 155                                                          | 144                                       |
| Ag/SSR-PK10/ Pb-PbF <sub>2</sub>                                                                                                         | 100          | 6                                     | 25               | 190.6                                                        | 152                                       |
| CuF <sub>2</sub> / KSn <sub>2</sub> F <sub>5</sub> /Sn-SnF <sub>2</sub>                                                                  | 70           | 20                                    | 60               | 442.7                                                        | 150                                       |
| BiF <sub>3</sub> / PbSnF <sub>4</sub> / Pb-PbF <sub>2</sub>                                                                              | 50           | 10                                    | 25               | 210.5                                                        | 173.9                                     |
| BiF <sub>3</sub> / PbSnF <sub>4</sub> /Sn                                                                                                | 10           | 10                                    | 25               | 175                                                          | 80                                        |
| BiF <sub>3</sub> /Ba <sub>0.95</sub> Ce <sub>0.05</sub> SnF <sub>4.05</sub> /Sn                                                          | 30           | 10                                    | 25               | 170.9                                                        | 84.5                                      |
| BiF <sub>3</sub> /La <sub>0.95</sub> Ba <sub>0.05</sub> F <sub>2.95</sub> /Ce                                                            | 8            | 4                                     | 60               | 245                                                          | 90                                        |
| CuF <sub>2</sub> /La <sub>0.9</sub> Ba <sub>0.1</sub> F <sub>2.9</sub> /La                                                               | 23           | 4                                     | 150              | 360                                                          | 40                                        |
| BiF <sub>3</sub> /Ba <sub>0.98</sub> Eu <sub>0.02</sub> F <sub>4.02</sub> /Sn                                                            | 20           | 10                                    | 25               | 106                                                          | 72                                        |
| BiF <sub>3</sub> / La <sub>0.9</sub> Ba <sub>0.1</sub> F <sub>2.9</sub> -BaSnF <sub>4</sub> /Ce                                          | 5            | 10                                    | 150              | 251                                                          | 119                                       |

**Table S2.** Structure parameters of  $\beta$ -PbSnF<sub>4</sub>.

| <b>Atom</b> | <b>site</b> | <b>x</b> | <b>y</b> | <b>z</b> | <b>Occupancy</b> |
|-------------|-------------|----------|----------|----------|------------------|
| Sn          | 2c          | 0        | 0.5      | 0.142840 | 1                |
| Pb          | 2c          | 0        | 0.5      | 0.618920 | 0.7              |
| Li          | 2c          | 0        | 0.5      | 0.618920 | 0.3              |
| F           | 2c          | 0        | 0.5      | 0.334240 | 1                |
| F           | 4f          | 0        | 0        | 0.201400 | 0.9              |
| F           | 2b          | 0        | 0        | 0.500000 | 0.9              |

The space group is P4/nmm. Refined lattice parameters are  $a = 4.3685 \text{ \AA}$ ,  $b = 4.3685 \text{ \AA}$ ,  $c = 11.0854 \text{ \AA}$ .
